# Supplementary material for: An Analysis of Contributing Mining Factors in Coal Workers’ Pneumoconiosis Prevalence in the United States Coal Mines, 1986-2018
Source: Research Square preprint supplement (doi:10.21203/rs.3.rs-506261/v1), 2021-05-13
Supplement: Supplementary file 1 [file aeb9ff755dd9199e13887011.docx]

**Supplemental Information:**

**Tables:**

**Table S.1.**

Correlation table for underground coal mines in the U.S., 1986-2018 (# of Observations = 29,707).

| Row | Categories | Variable | Number of CWP | CWP rate | Appalachia | Interior | Western | Small | Medium | Large | Thin seam | Medium seam | Thick seam | Bituminous | Anthracite |
| --- | --- | --- | --- | --- | --- | --- | --- | --- | --- | --- | --- | --- | --- | --- | --- |
| 1 | CWP number  and rate | Number of CWP | 1.00 |  |  |  |  |  |  |  |  |  |  |  |  |
| 2 | CWP rate | 0.051 | 1.00 |  |  |  |  |  |  |  |  |  |  |  |
| 3 | Geographic location | Appalachia | -0.01 | 0.00 | 1.00 |  |  |  |  |  |  |  |  |  |  |
| 4 | Interior | 0.031 | 0.00 | -0.701 | 1.00 |  |  |  |  |  |  |  |  |  |
| 5 | Western | -0.021 | 0.00 | -0.691 | -0.031 | 1.00 |  |  |  |  |  |  |  |  |
| 6 | Mine size | Small | -0.171 | 0.01 | 0.291 | -0.241 | -0.161 | 1.00 |  |  |  |  |  |  |  |
| 7 | Medium | 0.021 | 0.00 | -0.051 | 0.021 | 0.051 | -0.611 | 1.00 |  |  |  |  |  |  |
| 8 | Large | 0.191 | 0.00 | -0.311 | 0.281 | 0.161 | -0.721 | -0.121 | 1.00 |  |  |  |  |  |
| 9 | Seam thickness | Thin seam (≤40”) | -0.061 | -0.01 | 0.151 | -0.101 | -0.101 | 0.261 | -0.131 | -0.211 | 1.00 |  |  |  |  |
| 10 | Medium seam (>40, ≤75”) | 0.012 | 0.01 | 0.121 | -0.021 | -0.151 | -0.051 | 0.081 | -0.012 | -0.731 | 1.00 |  |  |  |
| 11 | Thick seam (>75”) | 0.051 | 0.00 | -0.361 | 0.161 | 0.351 | -0.271 | 0.051 | 0.291 | -0.251 | -0.481 | 1.00 |  |  |
| 12 | Coal rank | Bituminous | 0.021 | 0.00 | -0.051 | 0.041 | 0.041 | -0.111 | 0.061 | 0.081 | 0.071 | -0.021 | -0.061 | 1.00 |  |
| 13 | Anthracite | -0.021 | 0.00*** | 0.051 | -0.041 | -0.041 | 0.111 | -0.061 | -0.081 | -0.071 | 0.021 | 0.061 | -1.001 | 1.00 |
| Row | Categories | Variable | Number of CWP | CWP rate | Appalachia | Interior | Western | Small | Medium | Large | Thin seam | Medium seam | Thick seam | Bituminous | Anthracite |

1*p* < 0.01, 2*p* < 0.05, 3*p* < 0.1, The numbers without superscripts are not significant at *p* < 0.1.

**Table S.2.**

Correlation table (star means different significant level) for surface coal mines in the U.S., 1986-2018 (# of Observations = 32,643).

| Row | Categories | Variable | Number of CWP | CWP rate | Appalachia | | Interior | | Western | | Small | | Medium | | Large | | Thin seam | | Medium seam | | Thick seam | | Bituminous | | Anthracite | |
| --- | --- | --- | --- | --- | --- | --- | --- | --- | --- | --- | --- | --- | --- | --- | --- | --- | --- | --- | --- | --- | --- | --- | --- | --- | --- | --- |
| 1 | CWP number  and rate | Number of CWP | 1.00 |  |  | |  | |  | |  | |  | |  | |  | |  | |  | |  | |  | |
| 2 | CWP rate | 0.031 | 1.00 |  | |  | |  | |  | |  | |  | |  | |  | |  | |  | |  | |
| 3 | Geographic location | Appalachia | 0.011 | 0.00 | 1.00 | |  | |  | |  | |  | |  | |  | |  | |  | |  | |  | |
| 4 | Interior | -0.01 | 0.00 | -0.781 | | 1.00 | |  | |  | |  | |  | |  | |  | |  | |  | |  | |
| 5 | Western | -0.011 | 0.00 | -0.571 | | -0.071 | | 1.00 | |  | |  | |  | |  | |  | |  | |  | |  | |
| 6 | Mine size | Small | -0.091 | 0.00 | 0.401 | | -0.191 | | -0.391 | | 1.00 | |  | |  | |  | |  | |  | |  | |  | |
| 7 | Medium | 0.031 | 0.00 | -0.091 | | 0.081 | | 0.051 | | -0.681 | | 1.00 | |  | |  | |  | |  | |  | |  | |
| 8 | Large | 0.101 | 0.00 | -0.441 | | 0.191 | | 0.461 | | -0.671 | | -0.081 | | 1.00 | |  | |  | |  | |  | |  | |
| 9 | Seam thickness | Thin seam (≤40”) | -0.041 | 0.00 | 0.121 | | -0.01 | | -0.191 | | 0.201 | | -0.061 | | -0.201 | | 1.00 | |  | |  | |  | |  | |
| 10 | Medium seam (>40, ≤75”) | 0.021 | 0.01 | 0.081 | | 0.01 | | -0.141 | | -0.021 | | 0.031 | | -0.13 | | -0.741 | | 1.00 | |  | |  | |  | |
| 11 | Thick seam (>75”) | 0.041 | 0.00 | -0.281 | | -0.00 | | 0.451 | | -0.251 | | 0.041 | | 0.301 | | -0.411 | | -0.321 | | 1.00 | |  | |  | |
| 12 | Coal rank | Bituminous | -0.012 | 0.00 | -0.111 | | 0.081 | | 0.061 | | -0.091 | | 0.061 | | 0.071 | | 0.201 | | 0.021 | | -0.031 | | 1.00 | |  | |
| 13 | Anthracite | 0.012 | 0.00 | 0.111 | | -0.081 | | -0.061 | | 0.091 | | -0.061 | | -0.071 | | -0.201 | | -0.021 | | 0.031 | | -1.00 | | 1.00 | |
| Row | Categories | Variable | Number of CWP | CWP rate | Appalachia | Interior | | Western | | Small | | Medium | | Large | | Thin seam | | Medium seam | | Thick seam | | Bituminous | | Anthracite | |

1*p* < 0.01, 2*p* < 0.05, 3*p* < 0.1, The numbers without superscripts are not significant at *p* < 0.1.

**Table S3**

VIF test results for the reference points of each independent variable

| Variable | VIF |
| --- | --- |
| Medium size | 1.65 |
| Large size | 1.26 |
| Appalachia region | 2.29 |
| Interior region | 2.03 |
| Seam height ≤40 | 2.80 |
| Seam height >40 and ≤75 | 2.63 |

**Figures:**


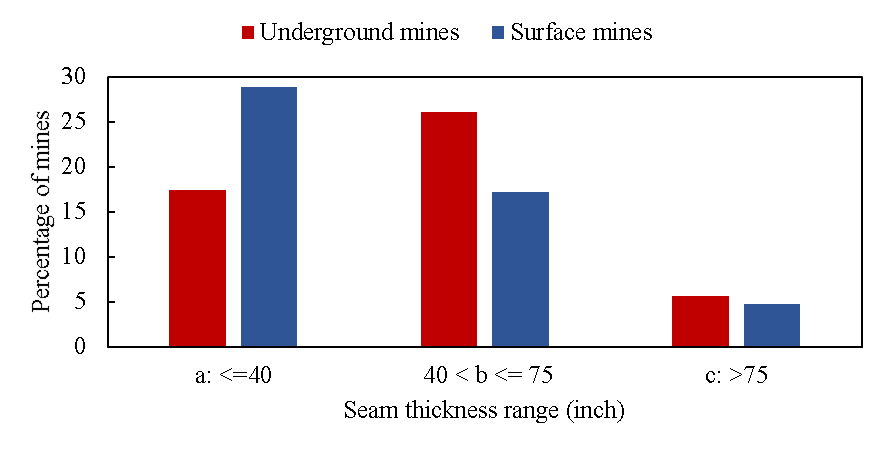


a **Fig. 2.** Number of CWP cases per subunit in Unites states coal mines during 1986-2018 (total number of CWP is 7337)


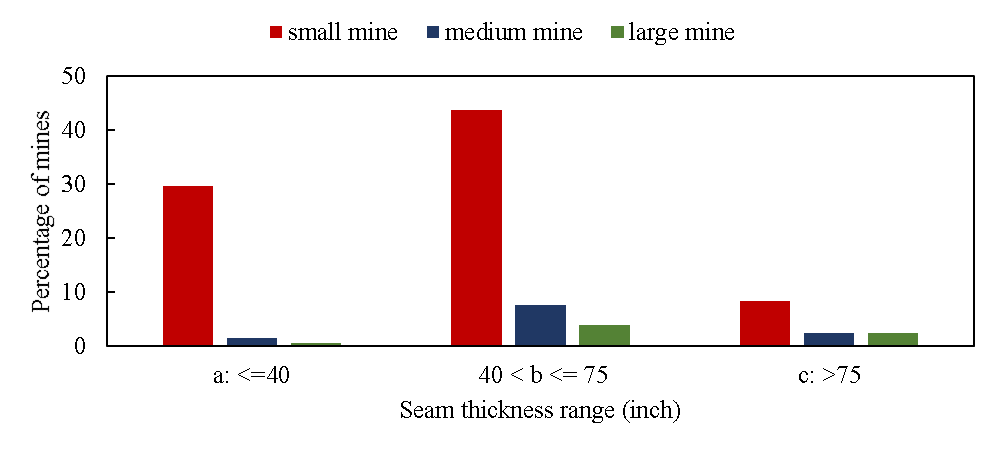


b


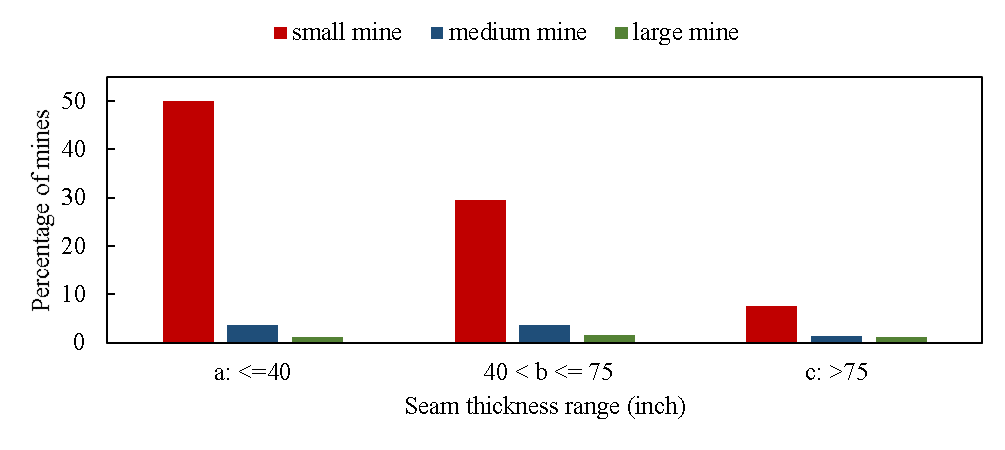


c

**Fig. S1.** Percentage of coal mines by coal seam thickness (a), and percentage of underground (b) and surface (c) coal mines by coal seam thickness and mine size in the U.S. during 1986-2018.
